# Supplementary material for: Ultrasound combined with manganese-oxide nanoparticles loaded on activated carbon for extraction and pre-concentration of thymol and carvacrol in methanolic extracts of Thymus daenensis, Salvia officinalis, Stachys pilifera, Satureja khuzistanica, and mentha, and water samples
Source: Royal Society of Chemistry journal article supplement (doi:10.1039/c8an02338g), 2019-01-01
Supplement: c8an02338g1.pdf [file c8an02338g1.pdf]

---

**Electronic Supplementary Information**

---

**Ultrasound-assisted combined with manganese-oxide nanoparticles loaded on activated carbon for extraction and pre-concentration of thymol and carvacrol in methanolic extracts of *Thymus daenensis*, *Salvia officinalis*, *Stachys pilifera*, *Satureja khuzistanica*, mentha, and water samples**

Arash Asfaram <sup>\*a</sup>, Hossein Sadeghi <sup>a</sup>, Alireza Goudarzi <sup>b</sup>, Esmael Panahi kokhdan <sup>a</sup> and  
Zeinab Salehpour <sup>a</sup>

<sup>a</sup> *Medicinal Plants Research Center, Yasuj University of Medical Sciences, Yasuj, Iran.*

<sup>b</sup> *Department of Polymer Engineering, Golestan University, Gorgan 49188-88369, Iran.*

---

---

\* Corresponding author: E-mail address:  
arash.asfaram@yums.ac.ir (A. Asfaram)

# Contents

## 1. Figures

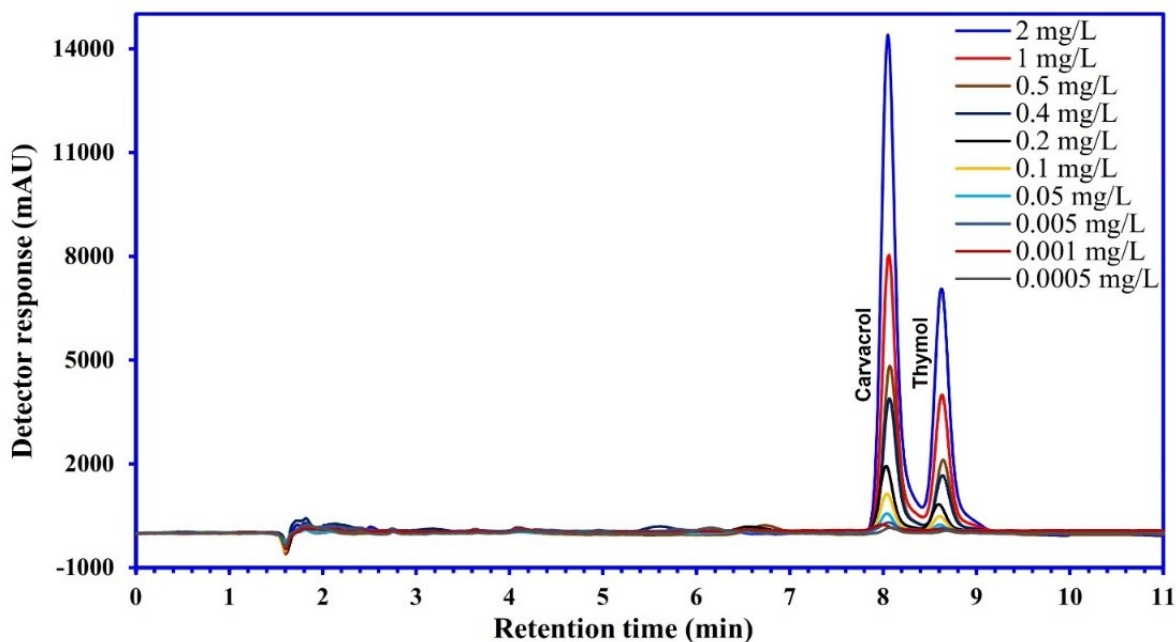

**Figure S1.** Calibration curve of carvacrol and thymol (mobile phase: acetonitrile-water (55:45, v/v); Flow rate: 1.1 mL min<sup>-1</sup>; KNAUER Smart line HPLC system with 2500 basic model UV detector, column (4.6 mm diameter × 250 mm length, particle size of 5 μm, with a pre-column (Eurospher 100-5 C18)) under ambient temperature (25 °C); λ = 220 nm).

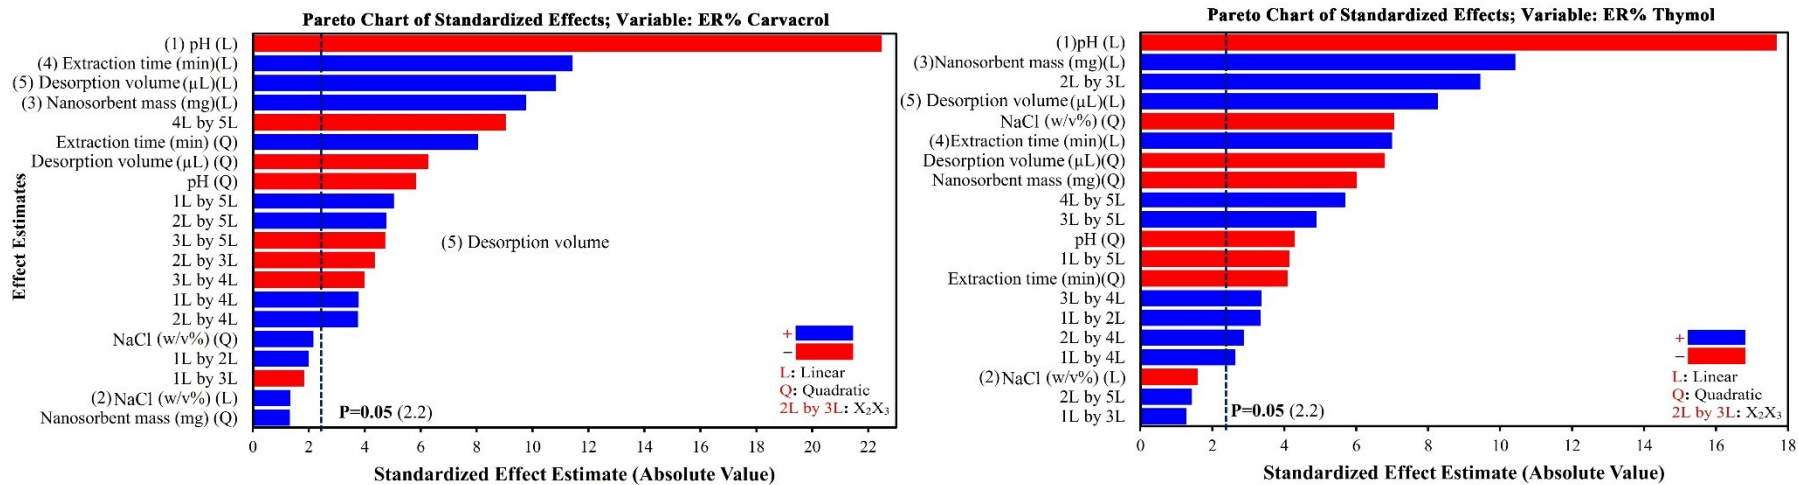

**Figure S2.** Pareto charts for the effect estimation. The effects presenting probability values higher than 0.05 were not considered as statistically significant.

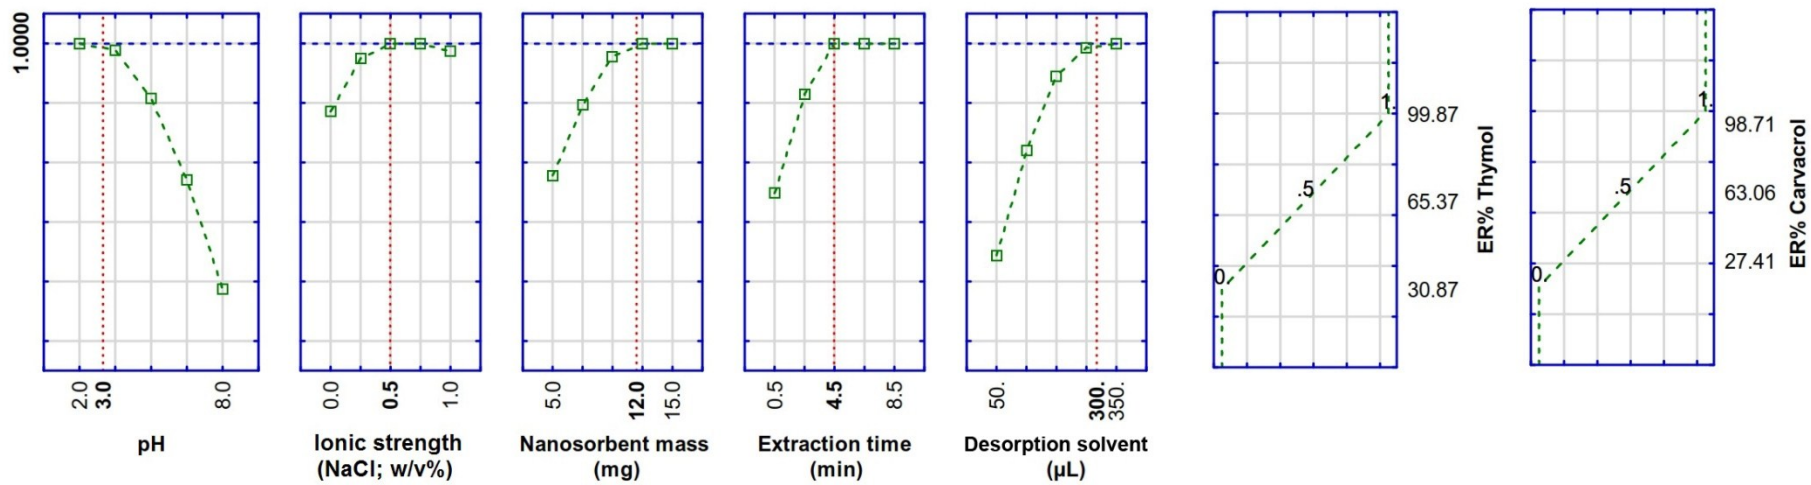

**Figure S3.** The conditions of profile optimum by the CCD design for the recovery of thymol and carvacrol.

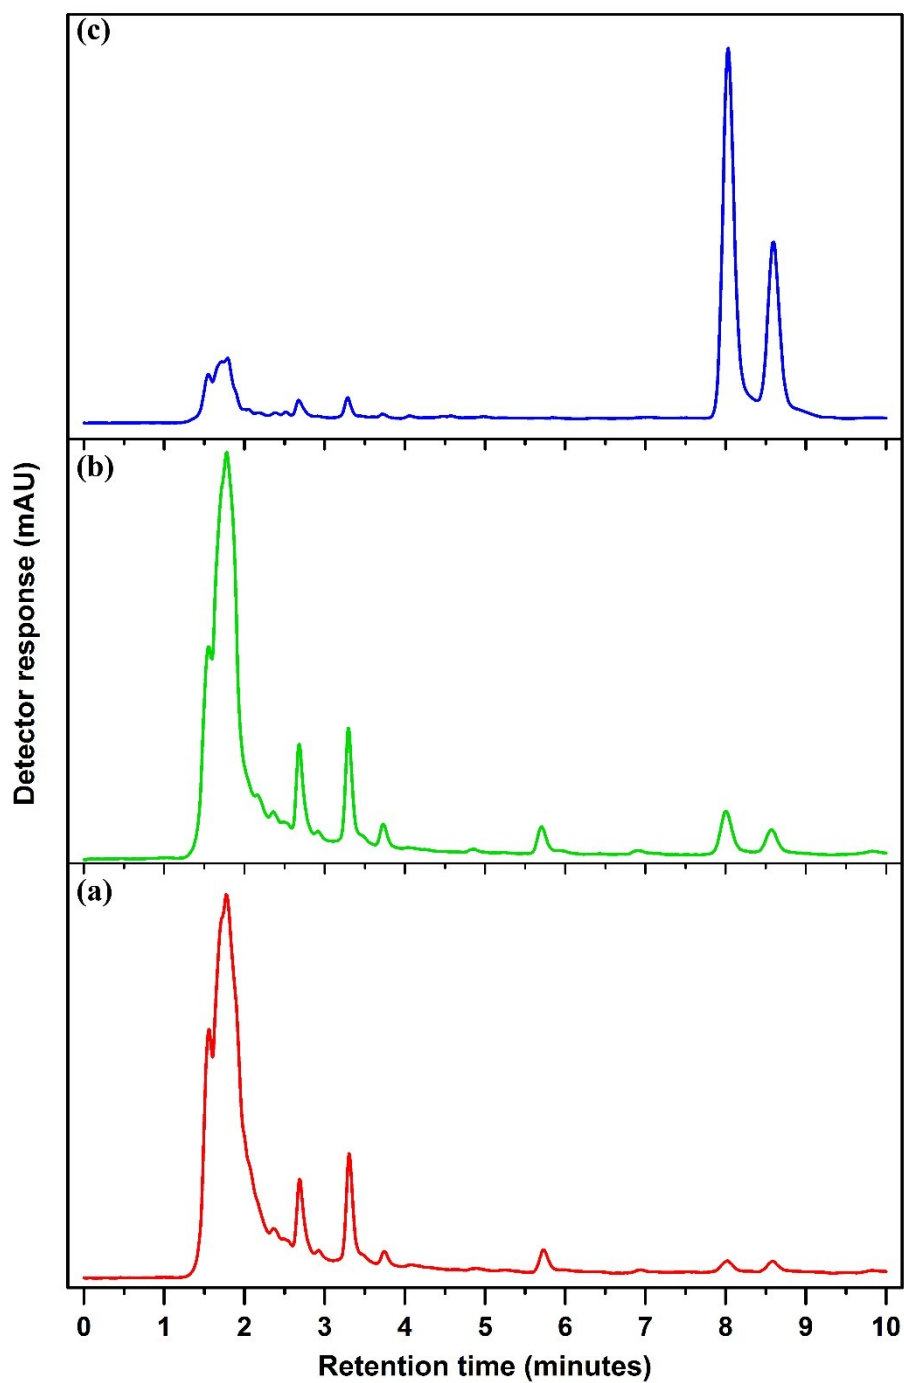

**Figure S4.** Typical chromatogram obtained for the extraction of *Thymus daenensis Celak* sample spiked with the two analytes under optimum conditions: (a) non-spiked, (b) spiked with 100 ng mL<sup>-1</sup> before DMSPE and (c) extracted from water sample after DMSPE of analytes.

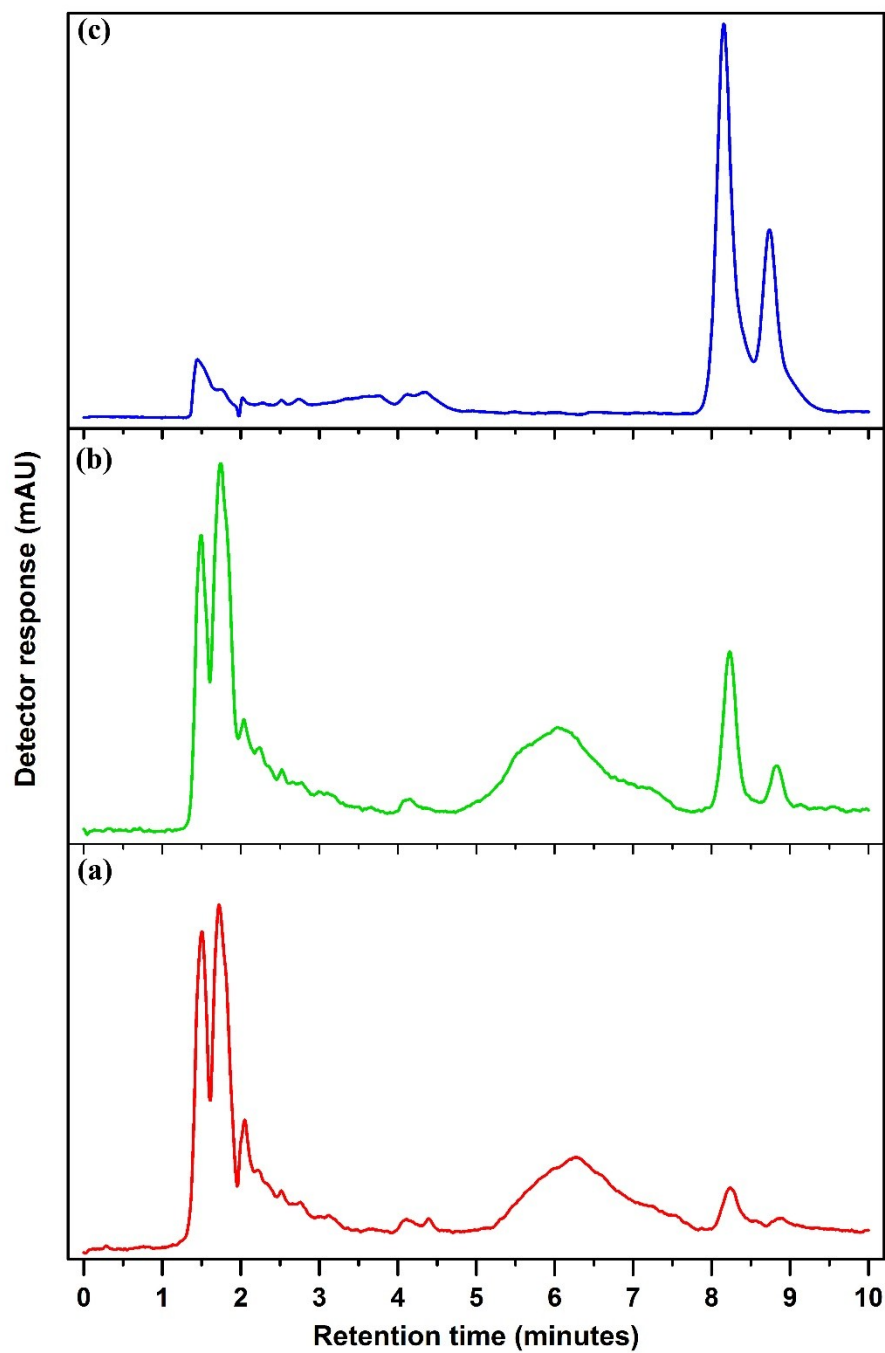

**Figure S5.** The chromatogram obtained by DMSPE-HPLC-UV for *Salvia officinalis* under optimum conditions: (a) non-spiked, (b) spiked with  $100 \text{ ng mL}^{-1}$  before DMSPE and (c) extracted from *Salvia officinalis* sample after DMSPE of thymol and carvacrol.

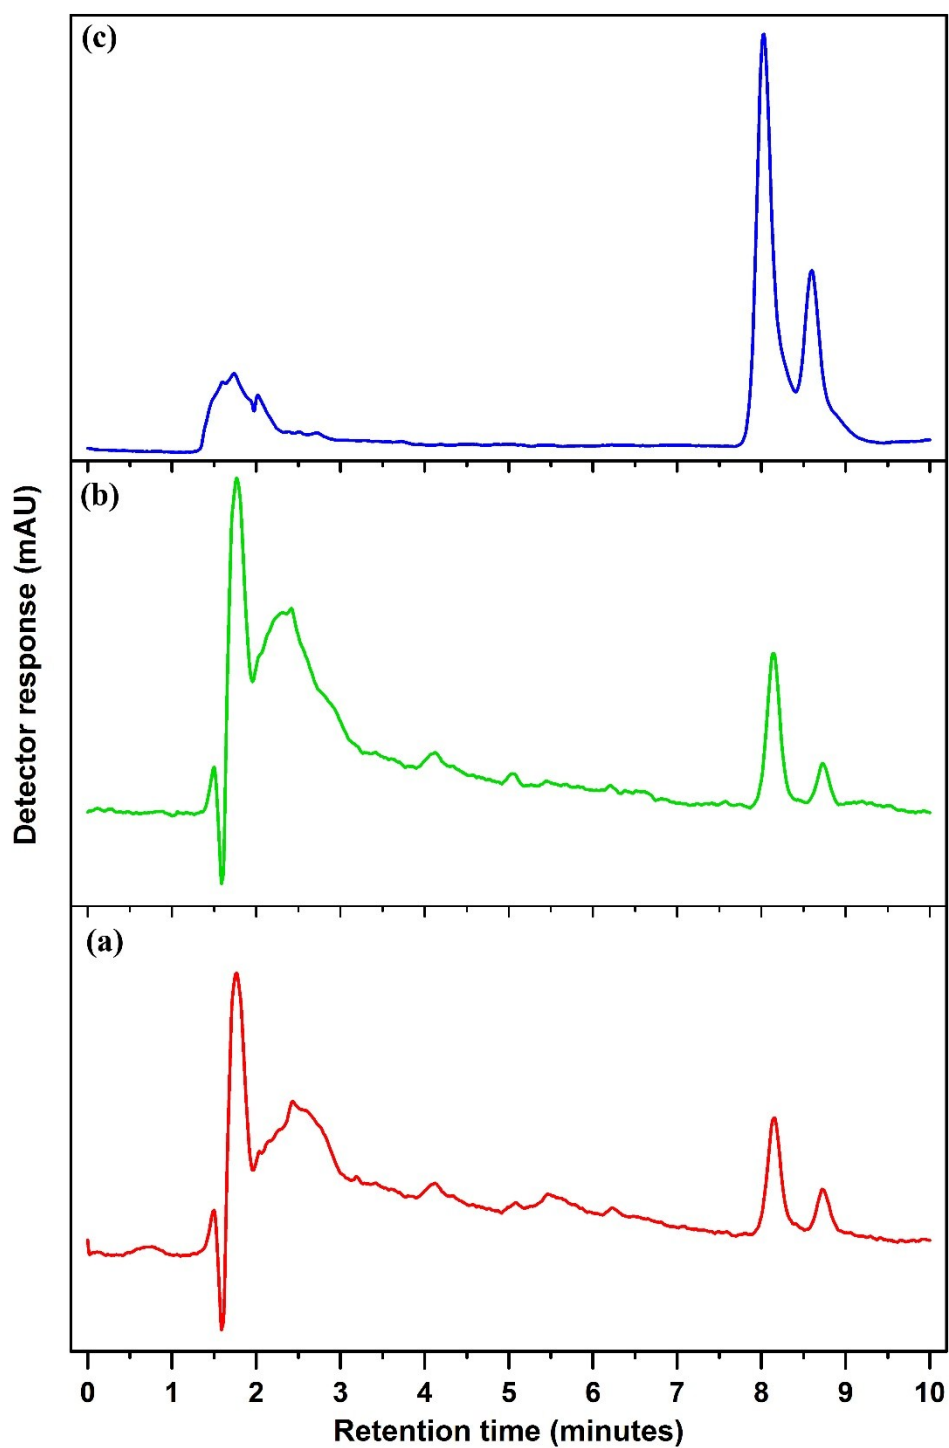

**Figure S6.** The chromatogram obtained by DMSPE-HPLC-UV for *Satureja khuzestanica* under optimum conditions: (a) non-spiked, (b) spiked with  $100 \text{ ng mL}^{-1}$  before DMSPE and (c) extracted from *Satureja khuzestanica* sample after DMSPE of analytes.

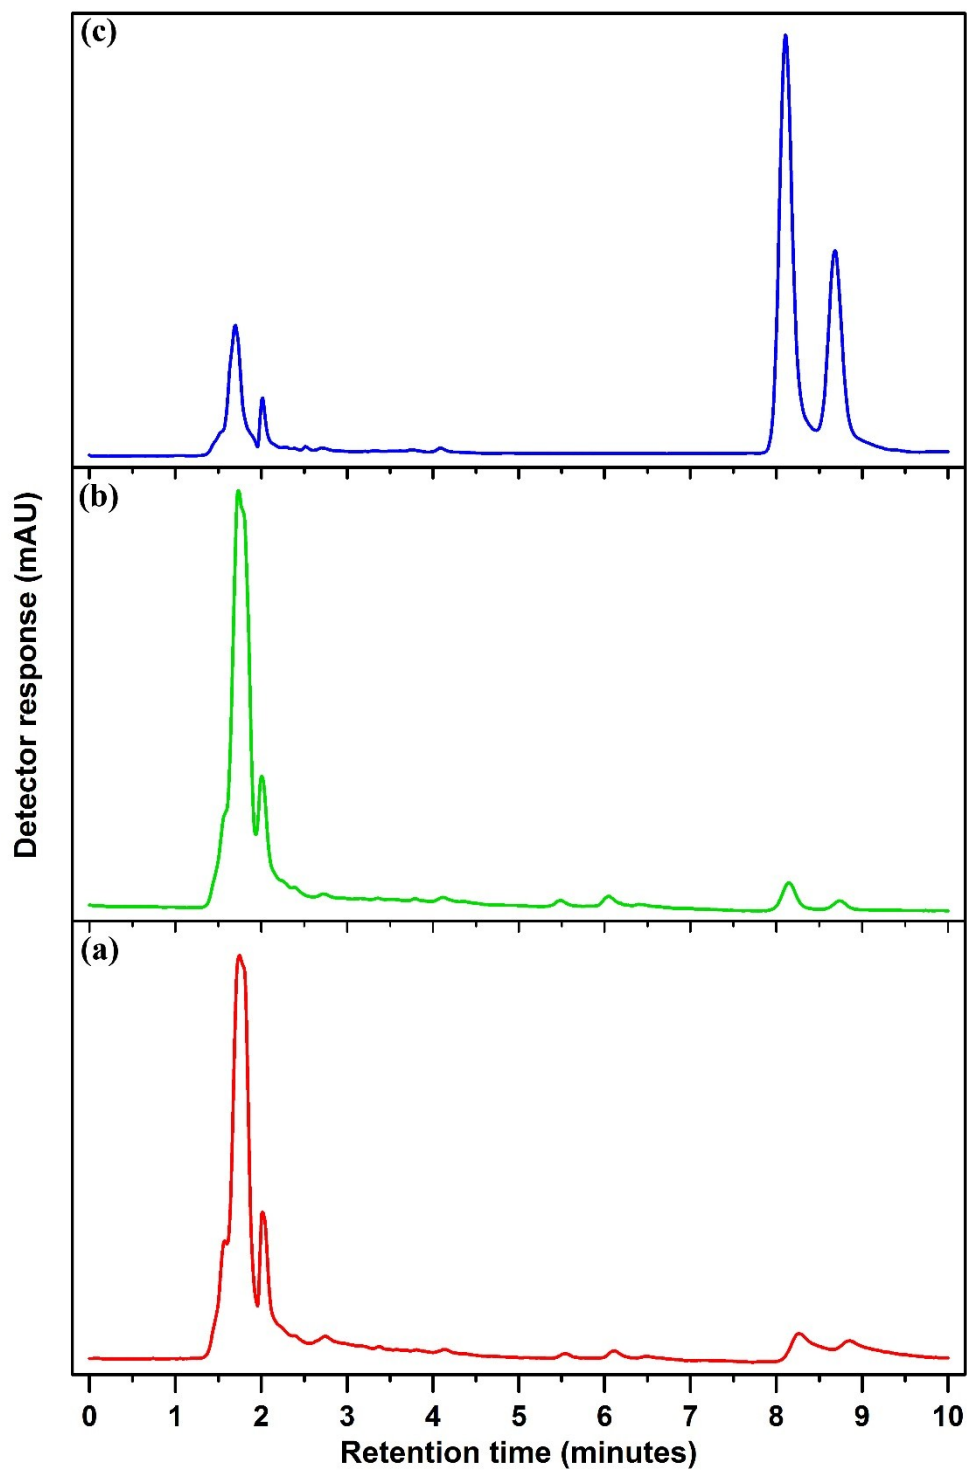

**Figure S7.** The chromatogram obtained by DMSPE-HPLC-UV for *Stachys pilifera* under optimum conditions: (a) non-spiked, (b) spiked with  $100 \text{ ng mL}^{-1}$  before DMSPE and (c) extracted from *Stachys pilifera* sample after DMSPE of thymol and carvacrol.



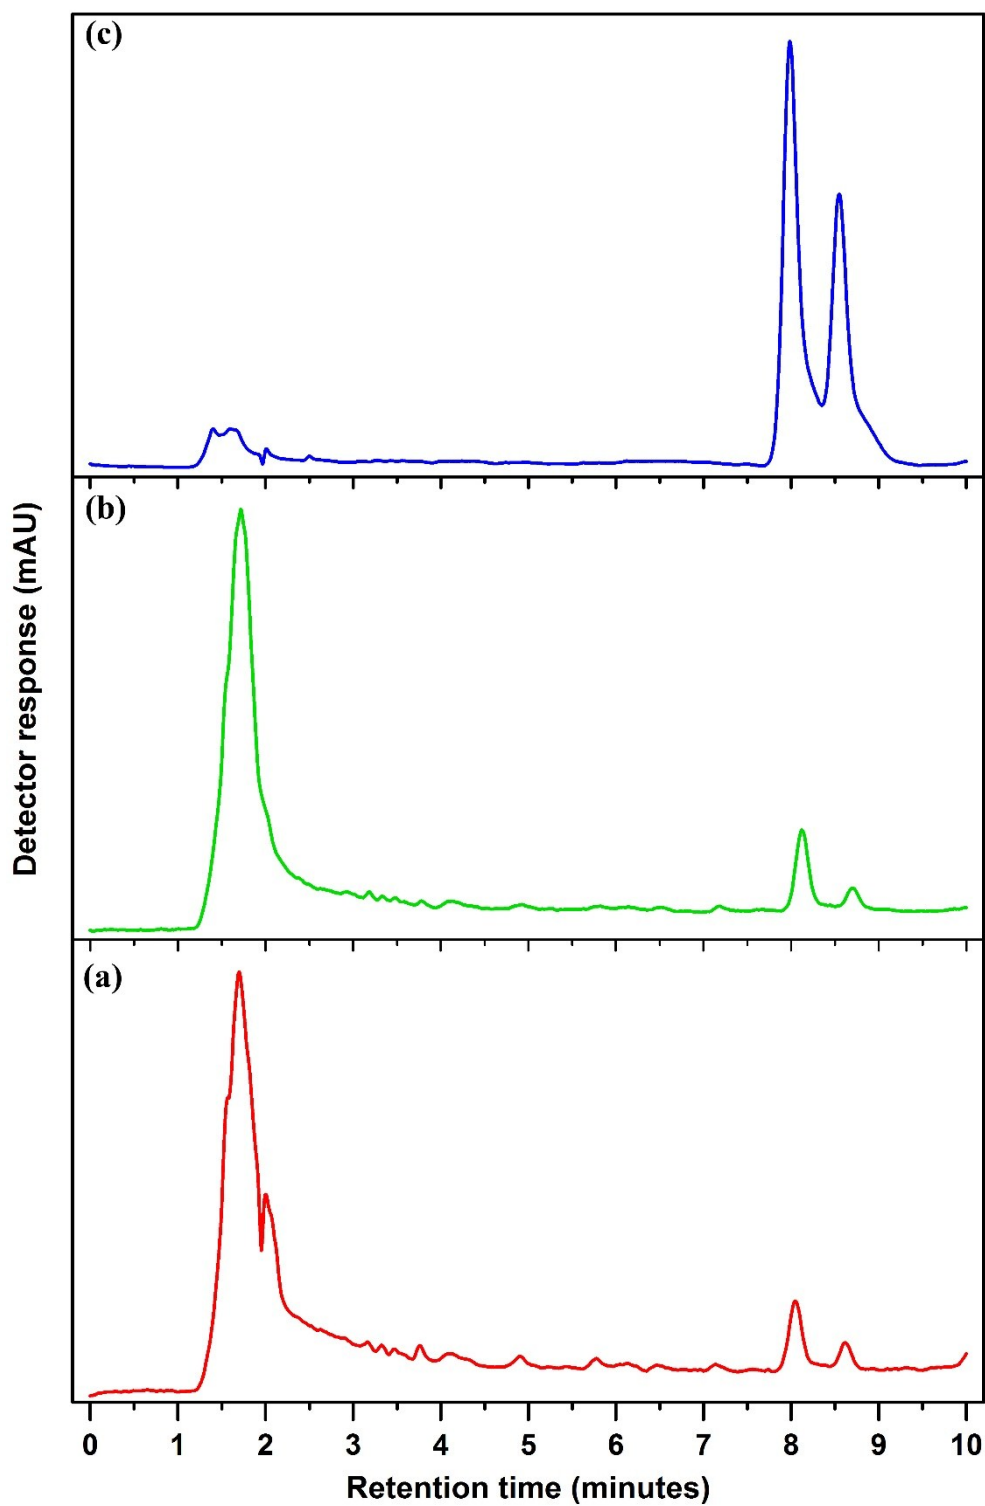

**Figure S8.** The chromatogram obtained by DMSPE-HPLC-UV for mentha under optimum conditions. (a) non-spiked, (b) spiked with  $100 \text{ ng mL}^{-1}$  before DMSPE and (c) extracted from Mentha sample after DMSPE of thymol and carvacrol.

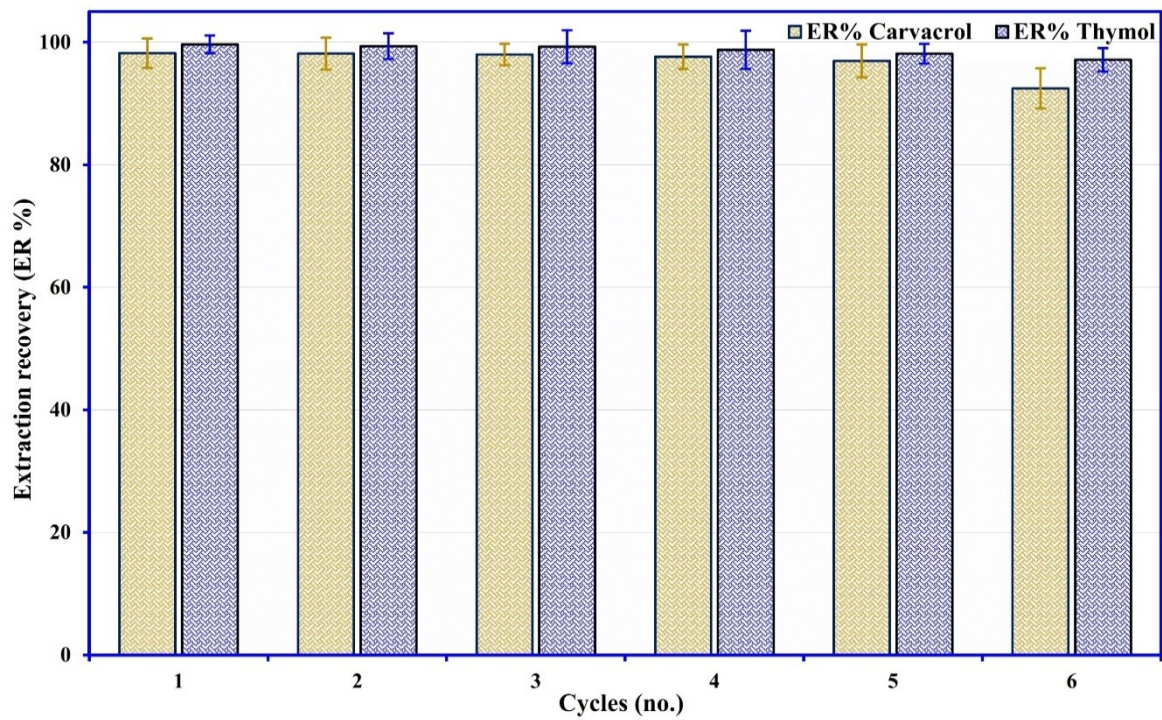

**Figure S9.** Reusability of nano-sorbent for DMSPE of thymol and carvacrol. The mean of three replicates was used as each extraction efficiency with error bar.

## 2. Tables

**Table S1.** CCD design matrix for five variables with the observed values for the recovery of thymol and carvacrol.

| Independent variables                   | Unit           | Levels ( $\alpha = 2$ ) |                |                |                |           |        |
|-----------------------------------------|----------------|-------------------------|----------------|----------------|----------------|-----------|--------|
|                                         |                | $-\alpha$               | Low (-1)       | Center (0)     | High (+1)      | $+\alpha$ |        |
| (X <sub>1</sub> ) pH                    | -              | 2.0                     | 3.5            | 5.0            | 6.5            | 8.0       |        |
| (X <sub>2</sub> ) Ionic strength (NaCl) | w/v%           | 0.00                    | 0.25           | 0.50           | 0.75           | 1.00      |        |
| (X <sub>3</sub> ) Nano-sorbent mass     | mg             | 5.5                     | 7.5            | 10.0           | 12.5           | 15.0      |        |
| (X <sub>4</sub> ) Contact time          | min            | 0.50                    | 2.50           | 4.50           | 6.50           | 8.50      |        |
| (X <sub>5</sub> ) Desorption volume     | $\mu$ L        | 50                      | 125            | 200            | 275            | 350       |        |
| Run                                     | Factors        |                         |                |                |                | ER%       |        |
|                                         | X <sub>1</sub> | X <sub>2</sub>          | X <sub>3</sub> | X <sub>4</sub> | X <sub>5</sub> | Carvacrol | Thymol |
| 1                                       | 1              | -1                      | -1             | -1             | -1             | 40.260    | 58.760 |
| 2                                       | 1              | -1                      | -1             | 1              | 1              | 50.234    | 56.870 |
| 3                                       | 0              | 0                       | 0              | 0              | 0              | 73.300    | 86.210 |
| 4                                       | 1              | -1                      | 1              | -1             | 1              | 27.410    | 45.980 |
| 5                                       | 1              | 1                       | 1              | -1             | -1             | 46.222    | 58.760 |
| 6                                       | -2             | 0                       | 0              | 0              | 0              | 84.150    | 94.760 |
| 7                                       | 0              | 0                       | 0              | 0              | 0              | 74.040    | 83.110 |
| 8                                       | 0              | 0                       | -2             | 0              | 0              | 55.378    | 52.150 |
| 9                                       | 0              | 0                       | 0              | -2             | 0              | 39.676    | 63.708 |
| 10                                      | 1              | 1                       | 1              | 1              | 1              | 84.117    | 97.980 |
| 11                                      | 0              | 0                       | 0              | 0              | 0              | 69.180    | 82.270 |
| 12                                      | -1             | 1                       | -1             | 1              | 1              | 80.442    | 76.434 |
| 13                                      | -1             | 1                       | 1              | 1              | -1             | 60.517    | 78.970 |
| 14                                      | 0              | 0                       | 2              | 0              | 0              | 81.235    | 82.400 |
| 15                                      | -1             | -1                      | 1              | -1             | -1             | 60.060    | 69.870 |
| 16                                      | 0              | 0                       | 0              | 0              | 0              | 69.140    | 82.560 |
| 17                                      | 0              | -2                      | 0              | 0              | 0              | 69.260    | 70.540 |
| 18                                      | 0              | 0                       | 0              | 0              | 0              | 72.170    | 86.270 |
| 19                                      | 1              | -1                      | 1              | 1              | -1             | 51.320    | 50.890 |
| 20                                      | 0              | 0                       | 0              | 0              | -2             | 45.430    | 54.652 |
| 21                                      | 1              | 1                       | -1             | 1              | -1             | 33.422    | 45.518 |
| 22                                      | 0              | 2                       | 0              | 0              | 0              | 63.800    | 59.043 |
| 23                                      | -1             | -1                      | -1             | -1             | 1              | 64.270    | 85.890 |
| 24                                      | -1             | 1                       | -1             | -1             | -1             | 63.876    | 59.359 |
| 25                                      | -1             | 1                       | 1              | -1             | 1              | 86.508    | 91.469 |
| 26                                      | 0              | 0                       | 0              | 0              | 0              | 71.150    | 85.410 |
| 27                                      | 1              | 1                       | -1             | -1             | 1              | 31.855    | 30.873 |
| 28                                      | -1             | -1                      | 1              | 1              | 1              | 98.706    | 99.870 |
| 29                                      | 0              | 0                       | 0              | 0              | 2              | 70.119    | 76.040 |
| 30                                      | 2              | 0                       | 0              | 0              | 0              | 33.376    | 48.150 |
| 31                                      | -1             | -1                      | -1             | 1              | -1             | 64.885    | 73.650 |
| 32                                      | 0              | 0                       | 0              | 2              | 0              | 68.418    | 80.143 |

**Table S2.** Analysis of variance (ANOVA) for the selected quadratic model.

| Source                        | Degree of freedom | ER% Carvacrol  |             |         |          | ER% Thymol     |             |         |          |
|-------------------------------|-------------------|----------------|-------------|---------|----------|----------------|-------------|---------|----------|
|                               |                   | Sum of squares | Mean square | F-value | P-value  | Sum of squares | Mean square | F-value | P-value  |
| Model                         | 20                | 9827.65        | 491.38      | 59.69   | < 0.0001 | 9334           | 466.7       | 43.66   | < 0.0001 |
| X <sub>1</sub>                | 1                 | 4159.92        | 4159.92     | 505.32  | < 0.0001 | 3339           | 3339        | 312.4   | < 0.0001 |
| X <sub>2</sub>                | 1                 | 14.87          | 14.87       | 1.81    | 0.2060   | 26.91          | 26.91       | 2.517   | 0.1409   |
| X <sub>3</sub>                | 1                 | 785.79         | 785.79      | 95.45   | < 0.0001 | 1161           | 1161        | 108.6   | < 0.0001 |
| X <sub>4</sub>                | 1                 | 1075.55        | 1075.55     | 130.65  | < 0.0001 | 523.5          | 523.5       | 48.98   | < 0.0001 |
| X <sub>5</sub>                | 1                 | 967.22         | 967.22      | 117.49  | < 0.0001 | 730            | 730         | 68.3    | < 0.0001 |
| X <sub>1</sub> X <sub>2</sub> | 1                 | 32.98          | 32.98       | 4.01    | 0.0706   | 119.2          | 119.2       | 11.16   | 0.0066   |
| X <sub>1</sub> X <sub>3</sub> | 1                 | 27.51          | 27.51       | 3.34    | 0.0948   | 17.52          | 17.52       | 1.639   | 0.2268   |
| X <sub>1</sub> X <sub>4</sub> | 1                 | 118.32         | 118.32      | 14.37   | 0.0030   | 74.6           | 74.6        | 6.979   | 0.0229   |
| X <sub>1</sub> X <sub>5</sub> | 1                 | 211.66         | 211.66      | 25.71   | 0.0004   | 182.5          | 182.5       | 17.07   | 0.0017   |
| X <sub>2</sub> X <sub>3</sub> | 1                 | 155.76         | 155.76      | 18.92   | 0.0012   | 954.1          | 954.1       | 89.26   | < 0.0001 |
| X <sub>2</sub> X <sub>4</sub> | 1                 | 116.14         | 116.14      | 14.11   | 0.0032   | 88.65          | 88.65       | 8.293   | 0.0150   |
| X <sub>2</sub> X <sub>5</sub> | 1                 | 187.63         | 187.63      | 22.79   | 0.0006   | 21.88          | 21.88       | 2.047   | 0.1803   |
| X <sub>3</sub> X <sub>4</sub> | 1                 | 130.74         | 130.74      | 15.88   | 0.0021   | 121.2          | 121.2       | 11.34   | 0.0063   |
| X <sub>3</sub> X <sub>5</sub> | 1                 | 184.02         | 184.02      | 22.35   | 0.0006   | 256.2          | 256.2       | 23.97   | 0.0005   |
| X <sub>4</sub> X <sub>5</sub> | 1                 | 672.51         | 672.51      | 81.69   | < 0.0001 | 348.4          | 348.4       | 32.59   | 0.0001   |
| X <sub>1</sub> <sup>2</sup>   | 1                 | 279.69         | 279.69      | 33.97   | 0.0001   | 196.1          | 196.1       | 18.34   | 0.0013   |
| X <sub>2</sub> <sup>2</sup>   | 1                 | 38.53          | 38.53       | 4.68    | 0.0534   | 530.1          | 530.1       | 49.59   | < 0.0001 |
| X <sub>3</sub> <sup>2</sup>   | 1                 | 14.46          | 14.46       | 1.76    | 0.2120   | 386.6          | 386.6       | 36.17   | < 0.0001 |
| X <sub>4</sub> <sup>2</sup>   | 1                 | 534.04         | 534.04      | 64.87   | < 0.0001 | 178.6          | 178.6       | 16.71   | 0.0018   |
| X <sub>5</sub> <sup>2</sup>   | 1                 | 326.25         | 326.25      | 39.63   | < 0.0001 | 496.1          | 496.1       | 46.41   | < 0.0001 |
| Residual                      | 11                | 90.55          | 8.23        |         |          | 117.6          | 10.69       |         |          |
| Lack of Fit                   | 6                 | 69.34          | 11.56       | 2.72    | 0.1456   | 100.3          | 16.71       | 4.822   | 0.05261  |
| Pure Error                    | 5                 | 21.21          | 4.24        |         |          | 17.33          | 3.465       |         |          |
| Corr. Total                   | 31                | 9918.21        |             |         |          | 9452           |             |         |          |

**Table S3.** Characteristic data of the developed DMSPE-HPLC-UV method for the determination of thymol and carvacrol from methanolic extracts of plants and water samples.

| Quantitative analysis                                 | Values      |
|-------------------------------------------------------|-------------|
| Sample volume (mL)                                    | 15.0        |
| extraction solvent (mL)                               | 0.300       |
| Linear range (ng mL <sup>-1</sup> )                   | 0.4-6000    |
| correlation coefficients (R <sup>2</sup> )            | 0.985-0.999 |
| Limit of detections (LODs) (ng mL <sup>-1</sup> )     | 0.054-0.104 |
| Limit of quantification (LOQs) (ng mL <sup>-1</sup> ) | 0.178-0.345 |
| Enrichment factor (EF)                                | 100.5-222.8 |
| Preconcentration factor (PF)                          | 50.0        |
| Reproducibility (RSD, %)                              | 1.62-7.80   |
| Repeatability (RSD, %)                                | 1.37-5.20   |
